# Supplementary material for: Acid-catalyzed hydrolysis kinetics of organic hydroperoxides: Computational strategy and structure-activity relationship
Source: Copernicus journal article supplement (doi:10.5194/egusphere-2025-1662), 2025-04-25
Supplement: Supplementary file 1 [file egusphere-2025-1662-supplement.pdf]

*Supplement of*

## **Acid-catalyzed hydrolysis kinetics of organic hydroperoxides: Computational strategy and structure-activity relationship**

Qiaojing Zhao<sup>1</sup>, Fangfang Ma<sup>1,2</sup>, Hui Zhao<sup>1</sup>, Qian Xu<sup>1</sup>, Rujing Yin<sup>1\*</sup>, Hong-Bin Xie<sup>1\*</sup>, Xin Wang<sup>1,3</sup>, Jingwen Chen<sup>1</sup>

<sup>1</sup> Key Laboratory of Industrial Ecology and Environmental Engineering (Ministry of Education), School of Environmental Science and Technology, Dalian University of Technology, Dalian 116024, China

<sup>2</sup> College of Resources and Environmental Engineering, Guizhou University, Guiyang 550025, China

<sup>3</sup> Key Laboratory for Semi-Arid Climate Change of the Ministry of Education, College of Atmospheric Sciences, Lanzhou University, Lanzhou 730000, China

*Correspondence to:* Rujing Yin (yinrj@dlut.edu.cn) and Hong-Bin Xie (hbxie@dlut.edu.cn)

## Contents

|                  |     |
|------------------|-----|
| Figure S1 .....  | S3  |
| Figure S2 .....  | S3  |
| Figure S3 .....  | S4  |
| Figure S4 .....  | S5  |
| Figure S5 .....  | S6  |
| Figure S6 .....  | S7  |
| Figure S7 .....  | S8  |
| Figure S8 .....  | S9  |
| Figure S9 .....  | S10 |
| Figure S10 ..... | S11 |
| Figure S11 ..... | S12 |
| Figure S12 ..... | S13 |
| Figure S13 ..... | S14 |
| Figure S14 ..... | S15 |
| Figure S15 ..... | S15 |
| Figure S16 ..... | S16 |
| Figure S17 ..... | S17 |
| Figure S18 ..... | S17 |
| Figure S19 ..... | S18 |
| Table S1.....    | S19 |
| Table S2.....    | S21 |

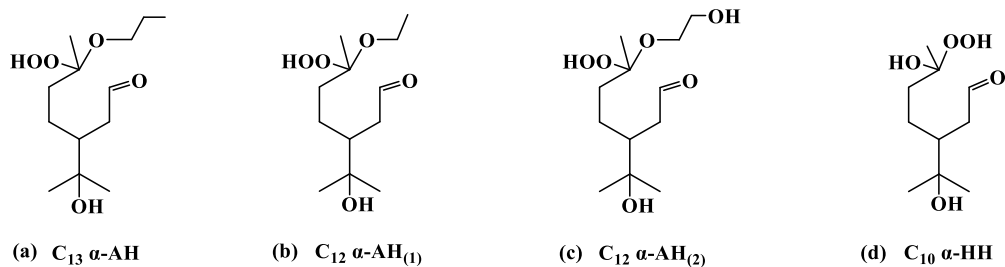

**Figure S1.** Structures of selected four ROOHs as tested compounds. Structure (a) is  $C_{13}$   $\alpha$ -AH derived via  $\alpha$ -terpineol derived CIs and 1-propanol, (b) is  $C_{12}$   $\alpha$ -AH<sub>(1)</sub> derived via  $\alpha$ -terpineol derived CIs and ethanol, (c) is  $C_{12}$   $\alpha$ -AH<sub>(2)</sub> derived via  $\alpha$ -terpineol derived CIs and ethylene glycol, and (d) is  $C_{10}$   $\alpha$ -HH derived via  $\alpha$ -terpineol derived CIs and water.

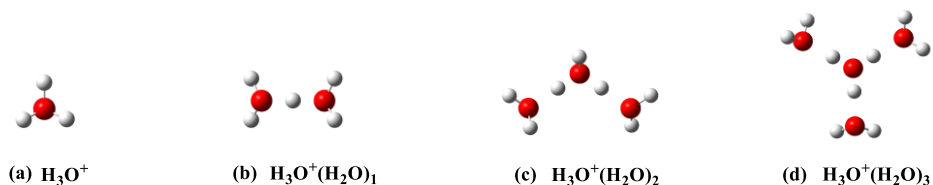

**Figure S2.** Minimum-energy structures of  $H_3O^+$  (a) and the protonated water clusters (b)  $H_3O^+(H_2O)_1$  (Zundel cation), (c)  $H_3O^+(H_2O)_2$ , (d)  $H_3O^+(H_2O)_3$  (Eigen cation). The atoms in red and white represent oxygen and hydrogen atoms, respectively.

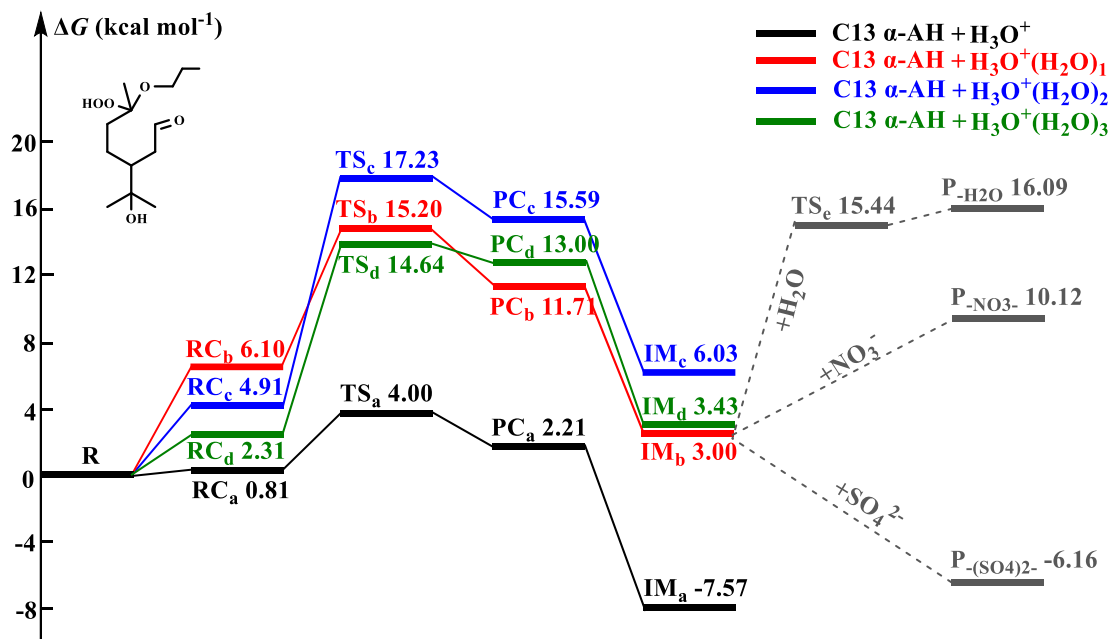

**Figure S3.** Calculated schematic free-energy surfaces for acid-catalyzed hydrolysis of C<sub>13</sub>  $\alpha$ -AH in four different cases at the SMD/M06-2X/6-311++G(3df,2pd)//M06-2X/6-31+G(d,p) level. The free energies of ROOH and H<sub>3</sub>O<sup>+</sup>(H<sub>2</sub>O)<sub>*n*</sub> (*n* = 0, 1, 2, 3) are set to zero (reference state, R). RC, TS<sub>*x*</sub> (*x* = a, b, c, d, e), PC, IM and P represent pre-reactive complexes, transition states, post-reactive complexes, intermediates and products, respectively.

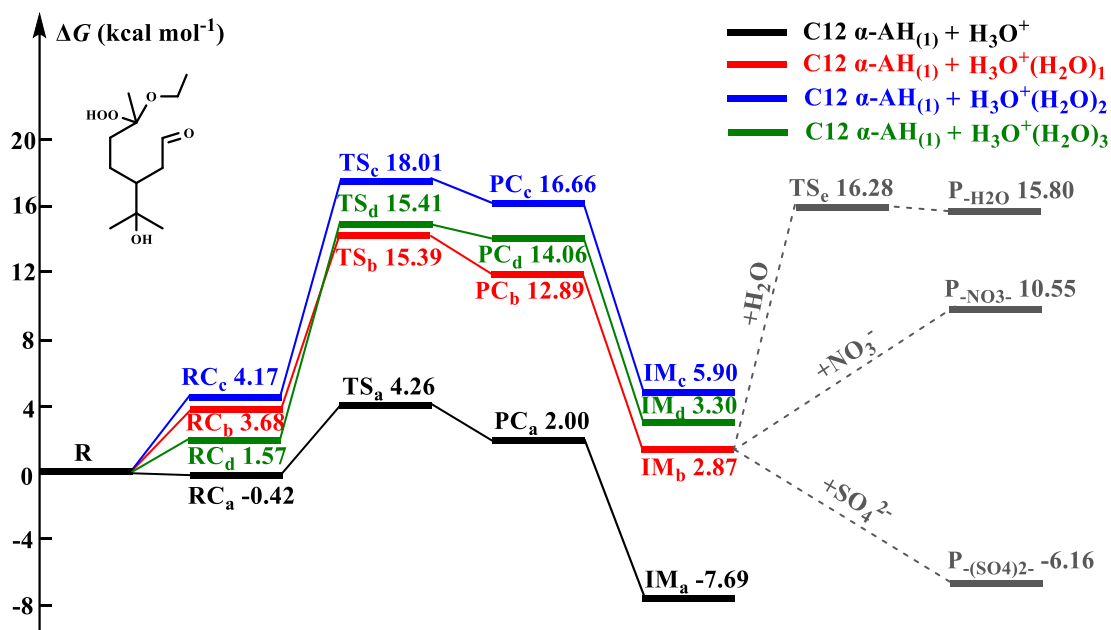

**Figure S4.** Calculated schematic free-energy surfaces for acid-catalyzed hydrolysis of C<sub>12</sub>  $\alpha$ -AH<sub>(1)</sub> in four different cases at the SMD/M06-2X/6-311++G(3df,2pd)//M06-2X/6-31+G(d,p) level. The free energies of ROOH and H<sub>3</sub>O<sup>+</sup>(H<sub>2</sub>O)<sub>n</sub> ( $n = 0, 1, 2, 3$ ) are set to zero (reference state, R). RC, TS<sub>x</sub> ( $x = a, b, c, d, e$ ), PC, IM and P represent pre-reactive complexes, transition states, post-reactive complexes, intermediates and products, respectively.

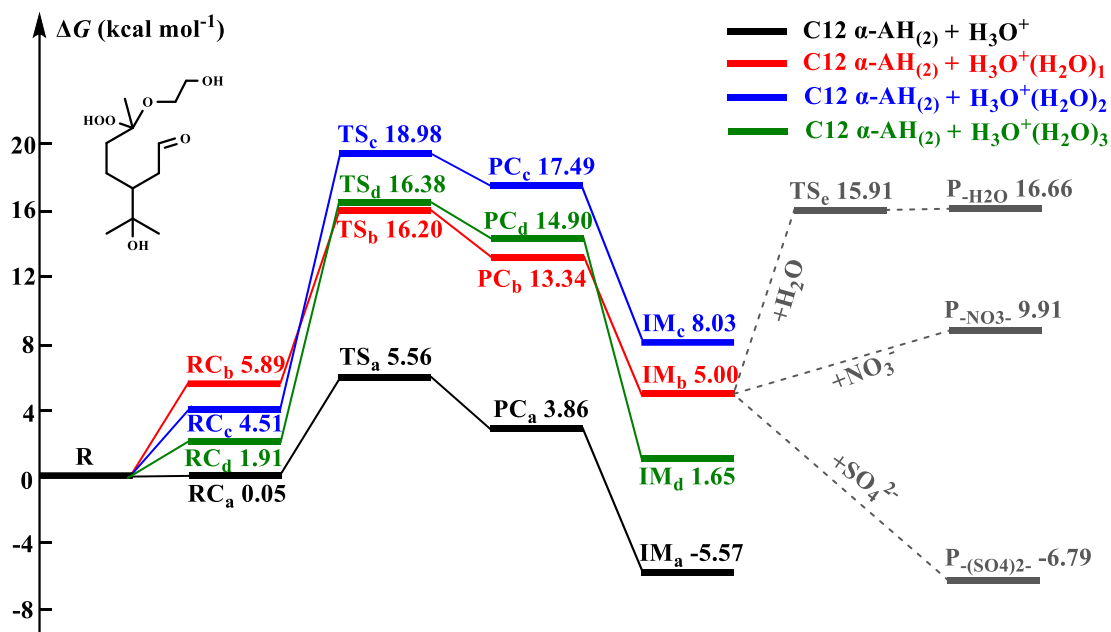

**Figure S5.** Calculated schematic free-energy surfaces for acid-catalyzed hydrolysis of C<sub>12</sub>  $\alpha$ -AH<sub>(2)</sub> in four different cases at the SMD/M06-2X/6-311++G(3df,2pd)//M06-2X/6-31+G(d,p) level. The free energies of ROOH and H<sub>3</sub>O<sup>+</sup>(H<sub>2</sub>O)<sub>*n*</sub> (*n* = 0, 1, 2, 3) are set to zero (reference state, R). RC, TS<sub>*x*</sub> (*x* = a, b, c, d, e), PC, IM and P represent pre-reactive complexes, transition states, post-reactive complexes, intermediates and products, respectively.

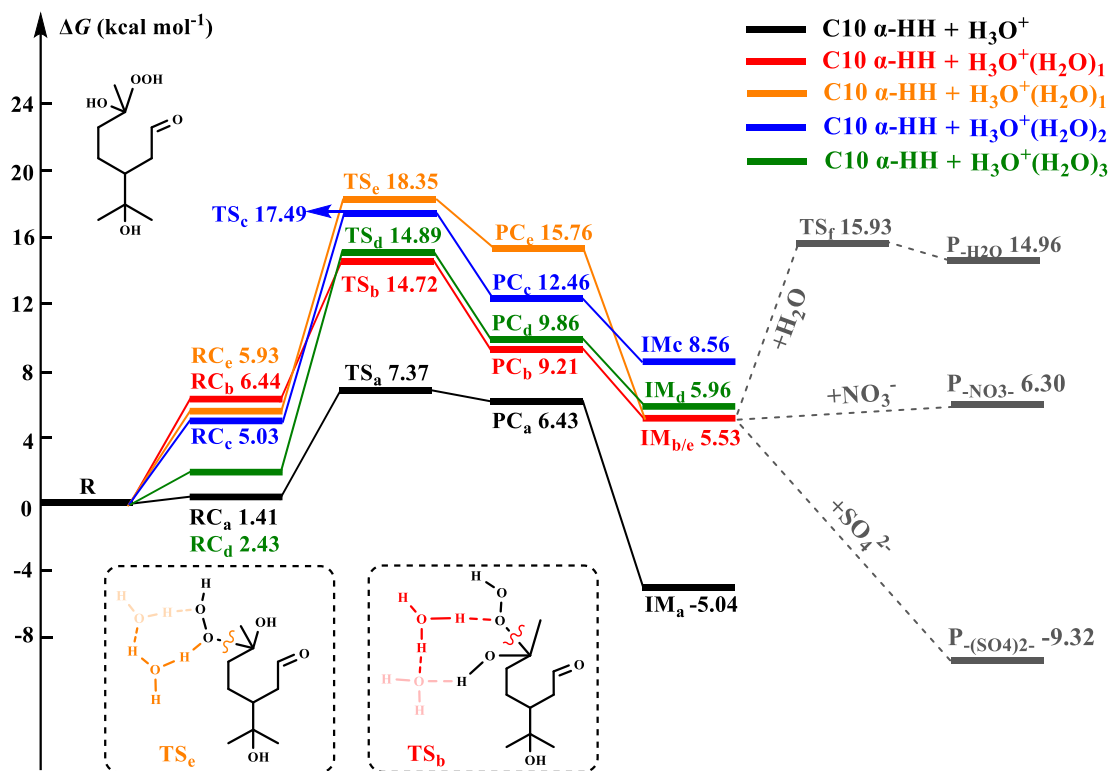

**Figure S6.** Calculated schematic free-energy surfaces for acid-catalyzed hydrolysis of C<sub>10</sub>  $\alpha$ -HH in four different cases at the SMD/M06-2X/6-311++G(3df,2pd)//M06-2X/6-31+G(d,p) level. The free energies of ROOH and  $\text{H}_3\text{O}^+(\text{H}_2\text{O})_n$  ( $n = 0, 1, 2, 3$ ) are set to zero (reference state, R). RC, TS<sub>*x*</sub> ( $x = a, b, c, d, e, f$ ), PC, IM and P represent pre-reactive complexes, transition states, post-reactive complexes, intermediates and products, respectively.

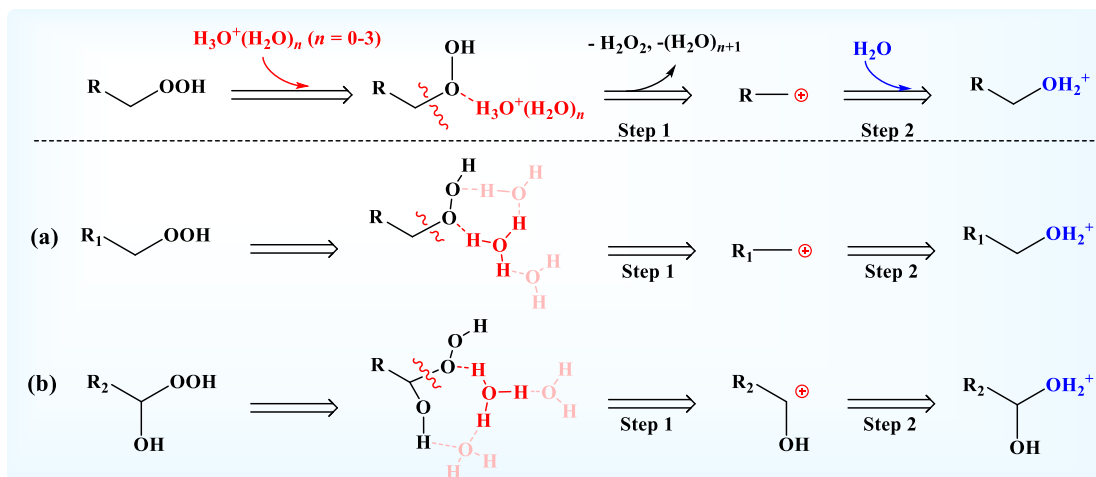

**Figure S7.** Two-step acid-catalyzed hydrolysis pathway for four tested ROOHs. The reaction pathways (a) for C<sub>13</sub> α-AH, C<sub>12</sub> α-AH<sub>(1)</sub>, and C<sub>12</sub> α-AH<sub>(2)</sub>, and (b) for C<sub>10</sub> α-HH.



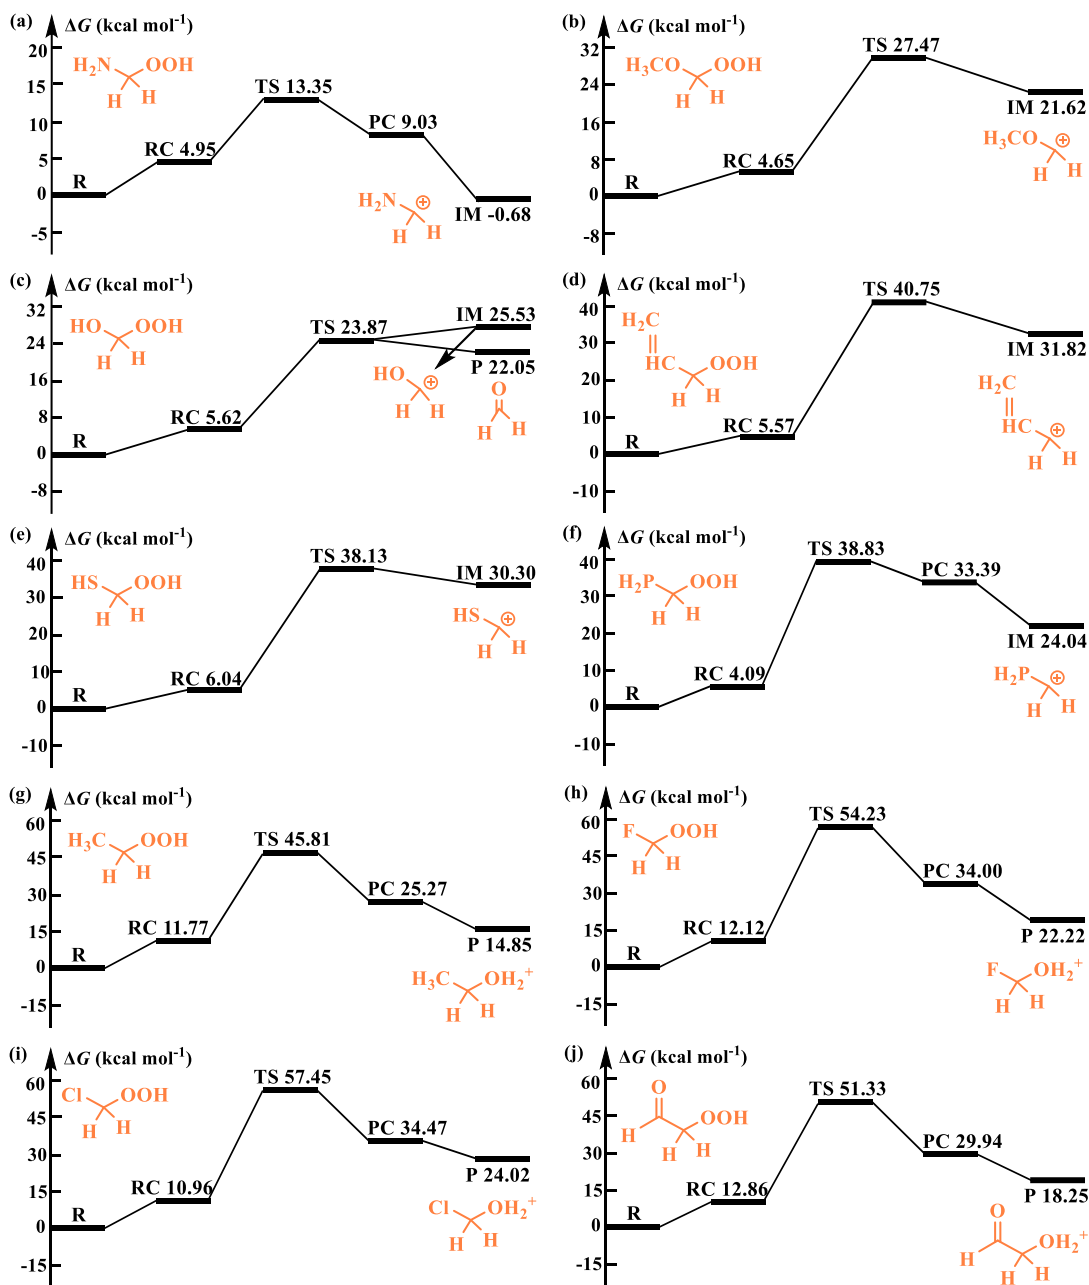

**Figure S8.** Calculated schematic free-energy surfaces for acid-catalyzed hydrolysis of  $\text{CH}_2(\text{X})\text{OOH}$  (X =  $\text{NH}_2$ ,  $\text{OCH}_3$ ,  $\text{OH}$ ,  $\text{CH}=\text{CH}_2$ ,  $\text{SH}$ ,  $\text{PH}_2$ ,  $\text{CH}_3$ ,  $\text{F}$ ,  $\text{Cl}$  and  $\text{CHO}$ ) at the SMD/M06-2X/6-311++G(3df,2pd)//M06-2X/6-31+G(d,p) level. The free energies of  $\text{ROOH}$  and  $\text{H}_3\text{O}^+(\text{H}_2\text{O})_1$  are set to zero (reference state, R). RC, TS, PC, IM and P represent pre-reactive complexes, transition states, post-reactive complexes, intermediates and products, respectively.

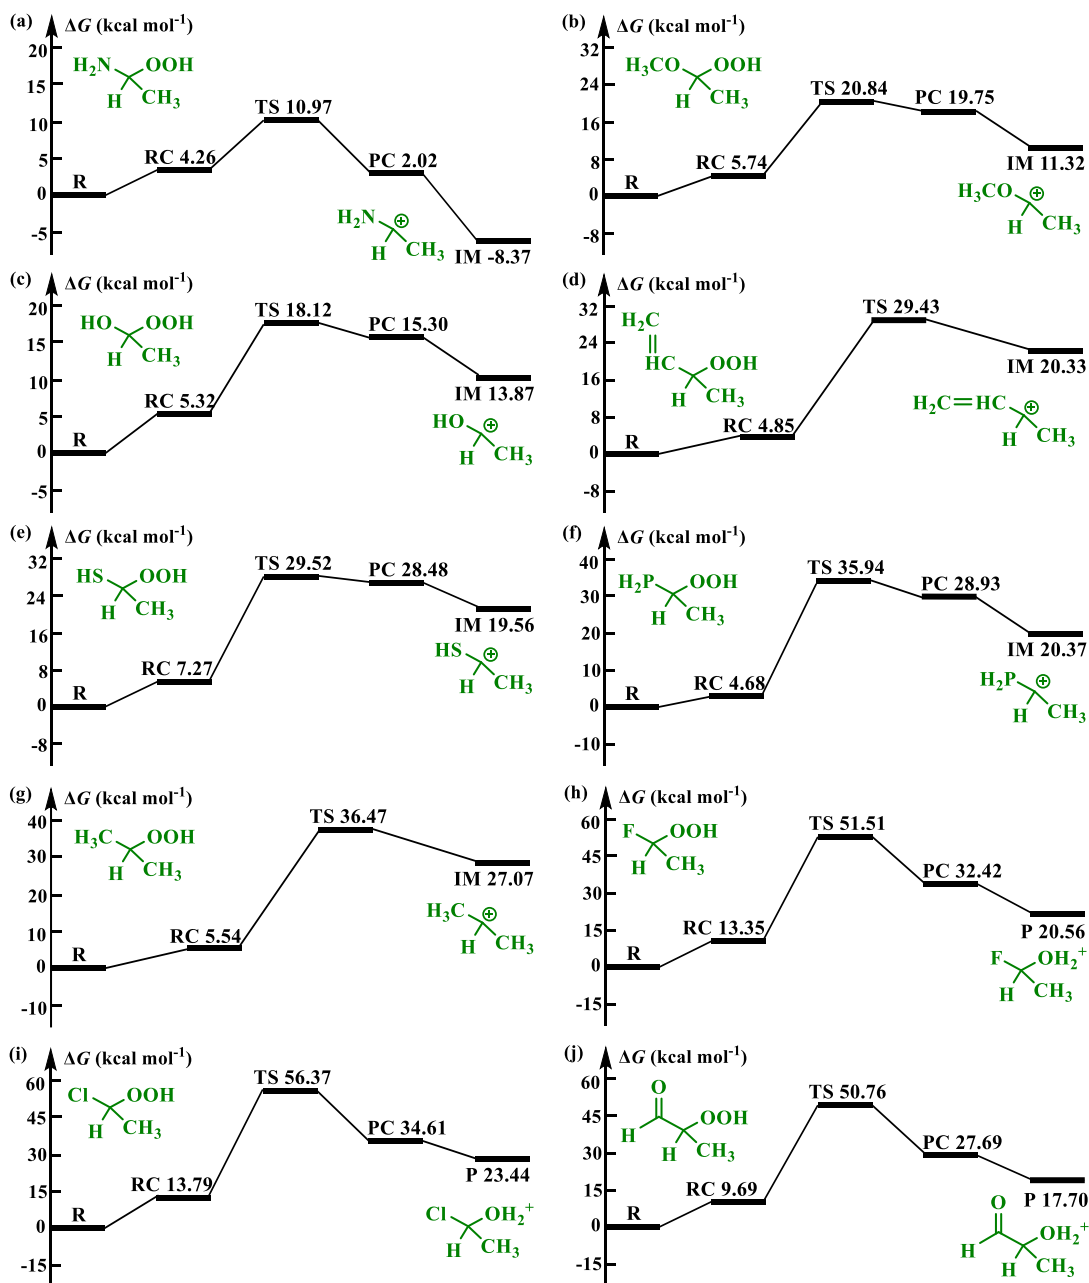

**Figure S9.** Calculated schematic free-energy surfaces for acid-catalyzed hydrolysis of  $\text{CH}(\text{CH}_3)(\text{X})\text{OOH}$  ( $\text{X} = \text{NH}_2, \text{OCH}_3, \text{OH}, \text{CH}=\text{CH}_2, \text{SH}, \text{PH}_2, \text{CH}_3, \text{F}, \text{Cl}$  and  $\text{CHO}$ ) at the SMD/M06-2X/6-311++G(3df,2pd)//M06-2X/6-31+G(d,p) level. The free energies of ROOH and  $\text{H}_3\text{O}^+(\text{H}_2\text{O})_1$  are set to zero (reference state, R). RC, TS, PC, IM and P represent pre-reactive complexes, transition states, post-reactive complexes, intermediates and products, respectively.

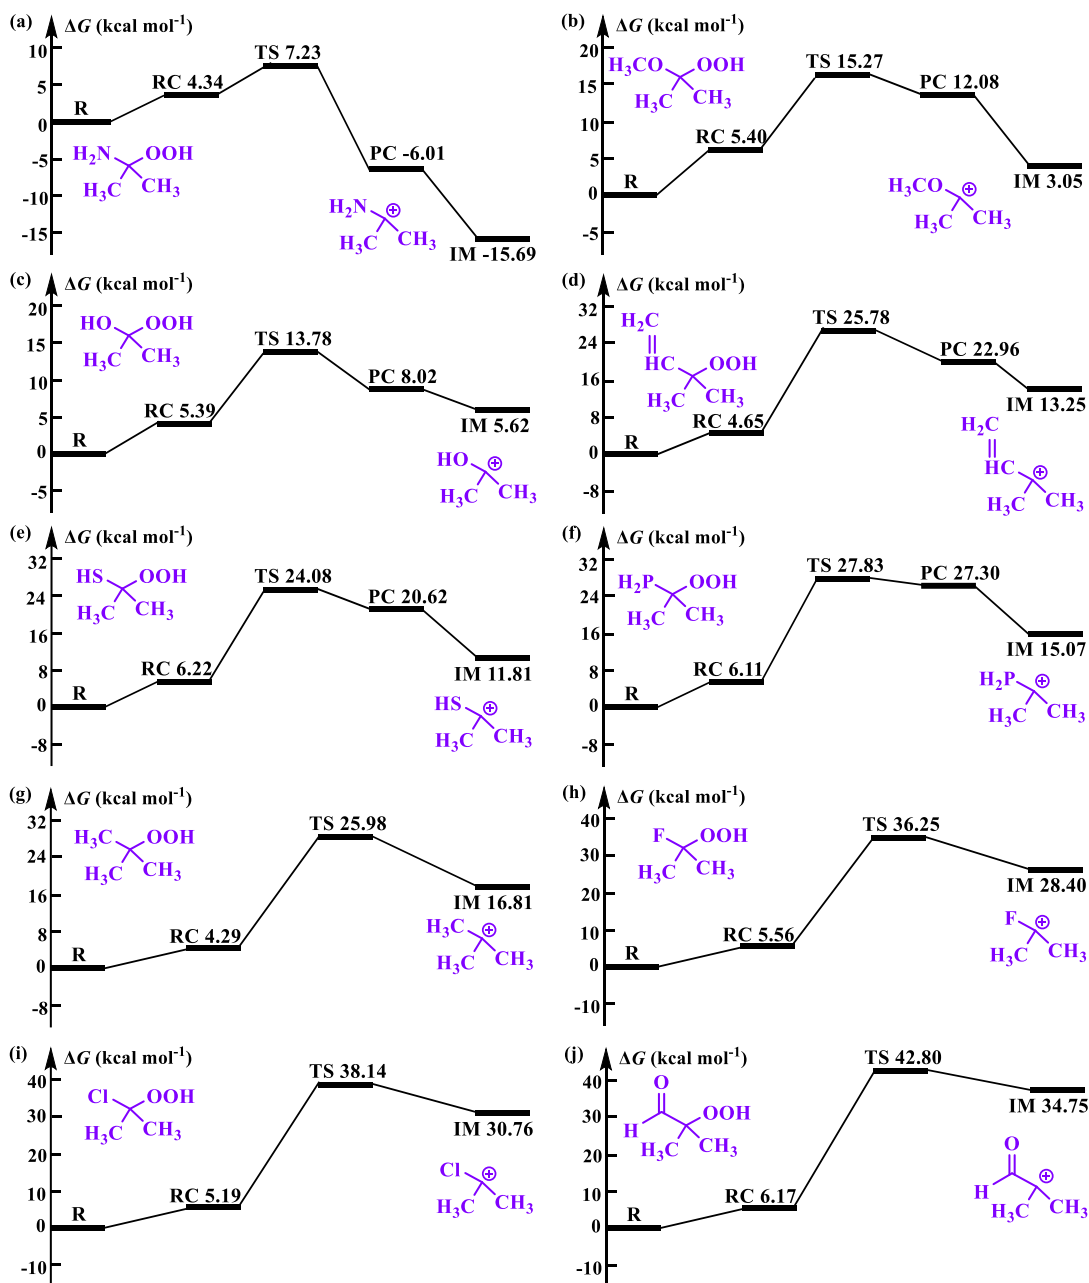

**Figure S10.** Calculated schematic free-energy surfaces for acid-catalyzed hydrolysis of  $(C(CH_3)_2(X)OOH)$  ( $X = NH_2, OCH_3, OH, CH=CH_2, SH, PH_2, CH_3, F, Cl$  and  $CHO$ ) at the SMD/M06-2X/6-311++G(3df,2pd)//M06-2X/6-31+G(d,p) level. The free energies of ROOH and  $H_3O^+(H_2O)_1$  are set to zero (reference state, R). RC, TS, PC and IM represent pre-reactive complexes, transition states, post-reactive complexes and intermediates, respectively.

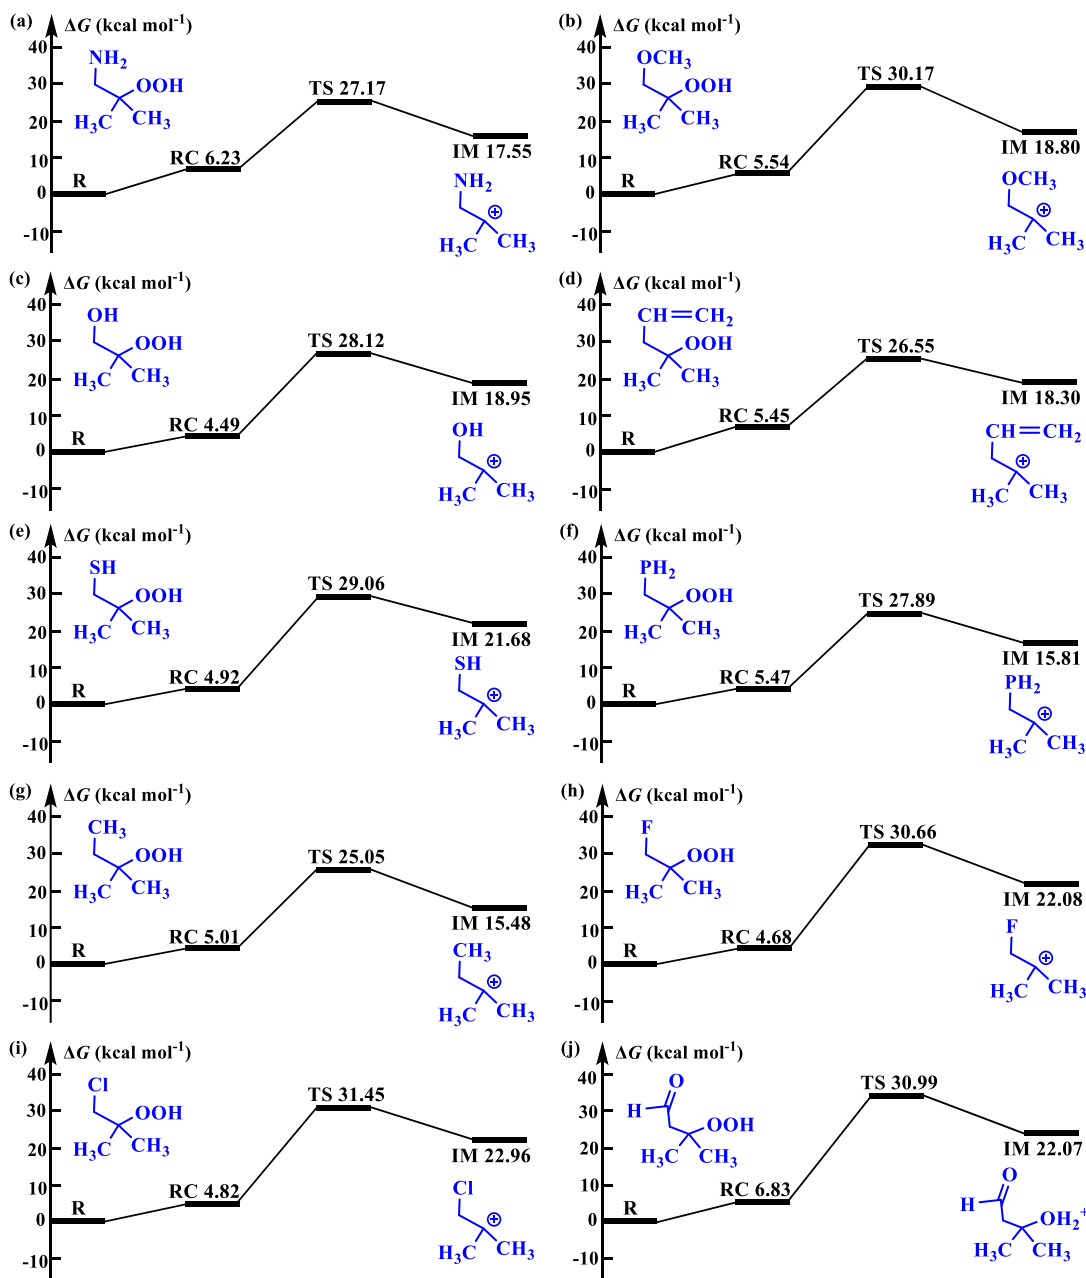

**Figure S11.** Calculated schematic free-energy surfaces for acid-catalyzed hydrolysis of  $\text{C}(\text{CH}_3)_2(\text{CH}_2(\text{X}))\text{OOH}$  ( $\text{X} = \text{NH}_2$ ,  $\text{OCH}_3$ ,  $\text{OH}$ ,  $\text{CH}=\text{CH}_2$ ,  $\text{SH}$ ,  $\text{PH}_2$ ,  $\text{CH}_3$ ,  $\text{F}$ ,  $\text{Cl}$  and  $\text{CHO}$ ) at the SMD/M06-2X/6-311++G(3df,2pd)//M06-2X/6-31+G(d,p) level. The free energies of ROOH and  $\text{H}_3\text{O}^+(\text{H}_2\text{O})_1$  are set to zero (reference state, R). RC, TS and IM represent pre-reactive complexes, transition states and intermediates, respectively.

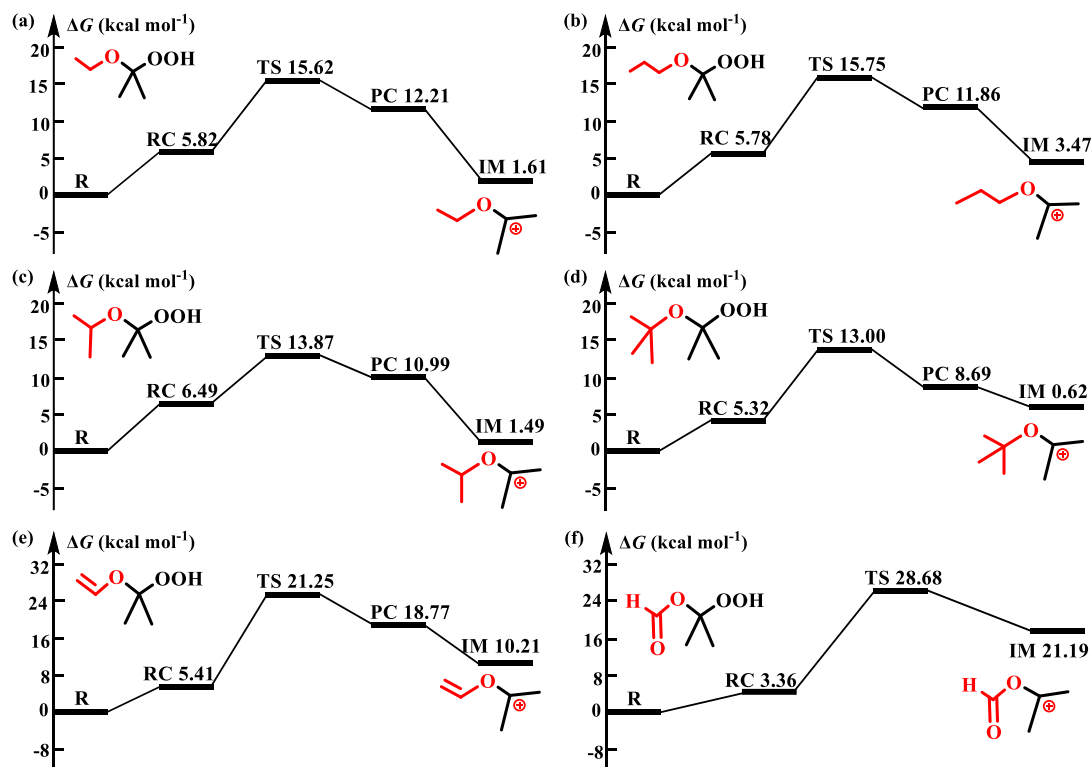

**Figure S12.** Calculated schematic free-energy surfaces for acid-catalyzed hydrolysis of  $C(CH_3)_2(OY)OOH$  (Y =  $CH_2CH_3$ ,  $CH_2CH_2CH_3$ ,  $CH(CH_3)_2$ ,  $C(CH_3)_3$ ,  $CH=CH_2$ , and  $CHO$ ) at the SMD/M06-2X/6-311++G(3df,2pd)//M06-2X/6-31+G(d,p) level. The free energies of ROOH and  $H_3O^+(H_2O)_1$  are set to zero (reference state, R). RC, TS, PC and IM represent pre-reactive complexes, transition states, post-reactive complexes and intermediates, respectively.

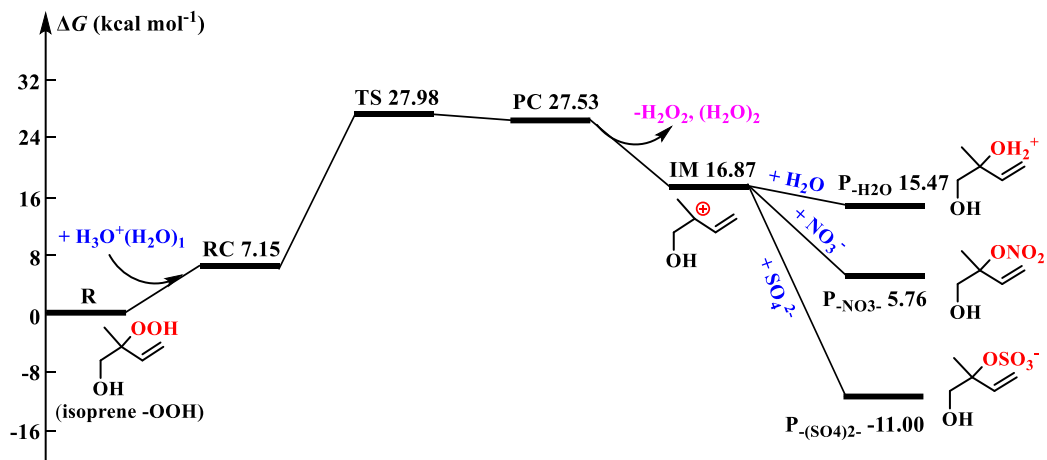

**Figure S13.** Calculated schematic free-energy surfaces for acid-catalyzed hydrolysis of isoprene-OOH at the SMD/M06-2X/6-311++G(3df,2pd)//M06-2X/6-31+G(d,p) level. The free energies of ROOH and H<sub>3</sub>O<sup>+</sup>(H<sub>2</sub>O)<sub>1</sub> are set to zero (reference state). RC, TS, PC, IM and P represent pre-reactive complexes, transition states, post-reactive complexes, intermediates and products, respectively.

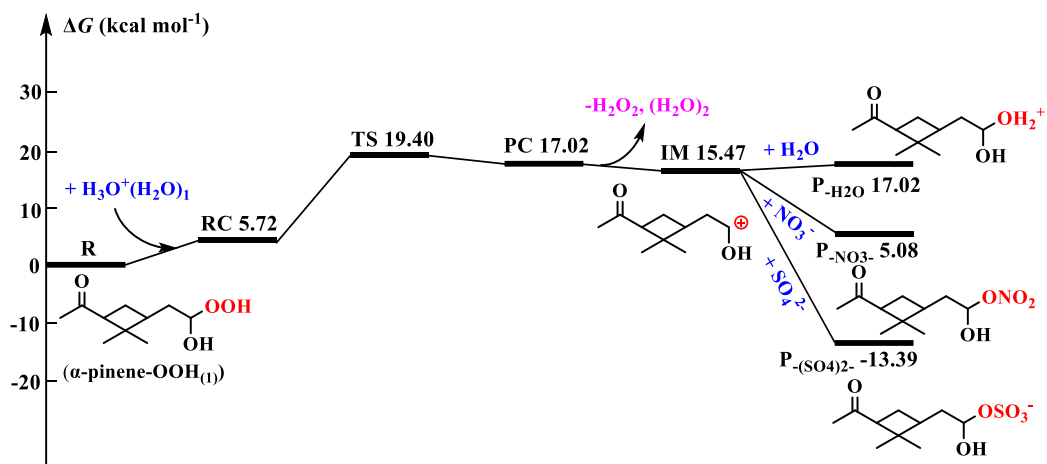

**Figure S14.** Calculated schematic free-energy surfaces for acid-catalyzed hydrolysis of  $\alpha$ -pinene-OOH<sub>(1)</sub> at the SMD/M06-2X/6-311++G(3df,2pd)//M06-2X/6-31+G(d,p) level. The free energies of ROOH and H<sub>3</sub>O<sup>+</sup>(H<sub>2</sub>O)<sub>1</sub> are set to zero (reference state). RC, TS, PC, IM and P represent pre-reactive complexes, transition states, post-reactive complexes, intermediates and products, respectively.

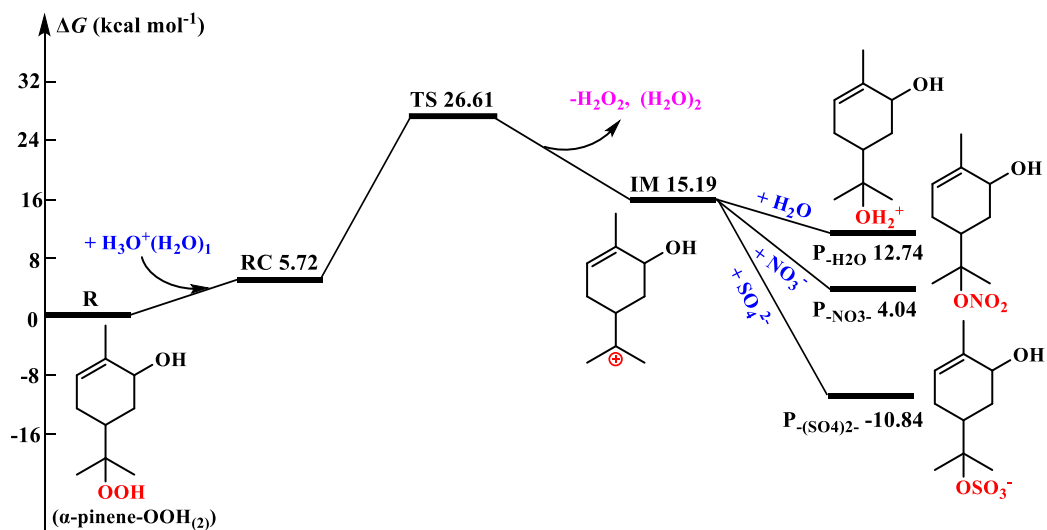

**Figure S15.** Calculated schematic free-energy surfaces for acid-catalyzed hydrolysis of  $\alpha$ -pinene-OOH<sub>(2)</sub> at the SMD/M06-2X/6-311++G(3df,2pd)//M06-2X/6-31+G(d,p) level. The free energies of ROOH and H<sub>3</sub>O<sup>+</sup>(H<sub>2</sub>O)<sub>1</sub> are set to zero (reference state). RC, TS, IM and P represent pre-reactive complexes, transition states, intermediates and products, respectively.

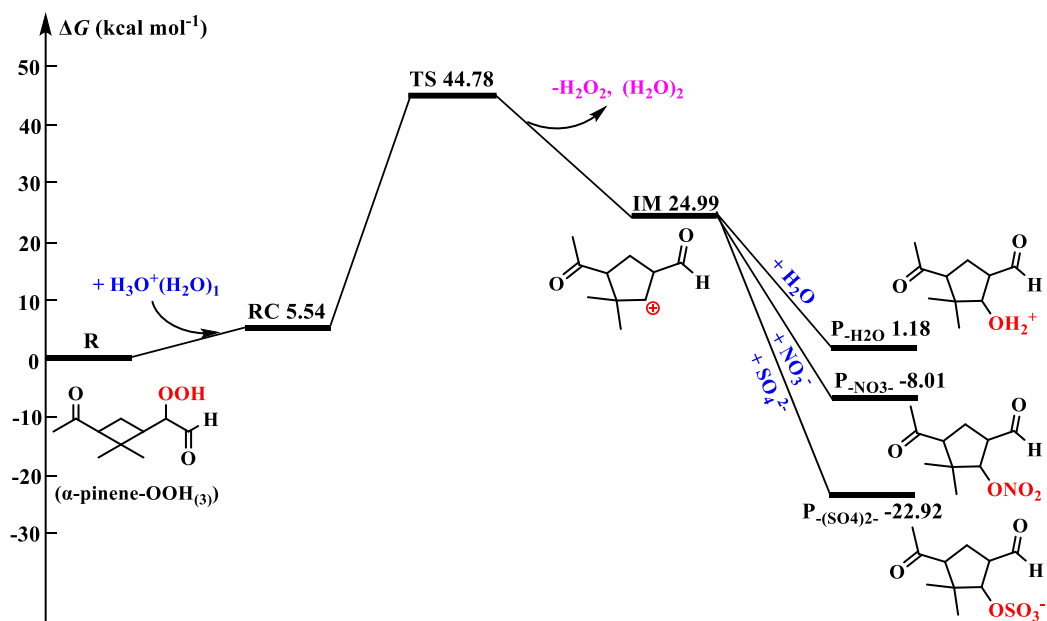

**Figure S16.** Calculated schematic free-energy surfaces for acid-catalyzed hydrolysis of  $\alpha$ -pinene-OOH<sub>(3)</sub> at the SMD/M06-2X/6-311++G(3df,2pd)//M06-2X/6-31+G(d,p) level. The free energies of ROOH and H<sub>3</sub>O<sup>+</sup>(H<sub>2</sub>O)<sub>1</sub> are set to zero (reference state). RC, TS, IM and P represent pre-reactive complexes, transition states, intermediates and products, respectively.



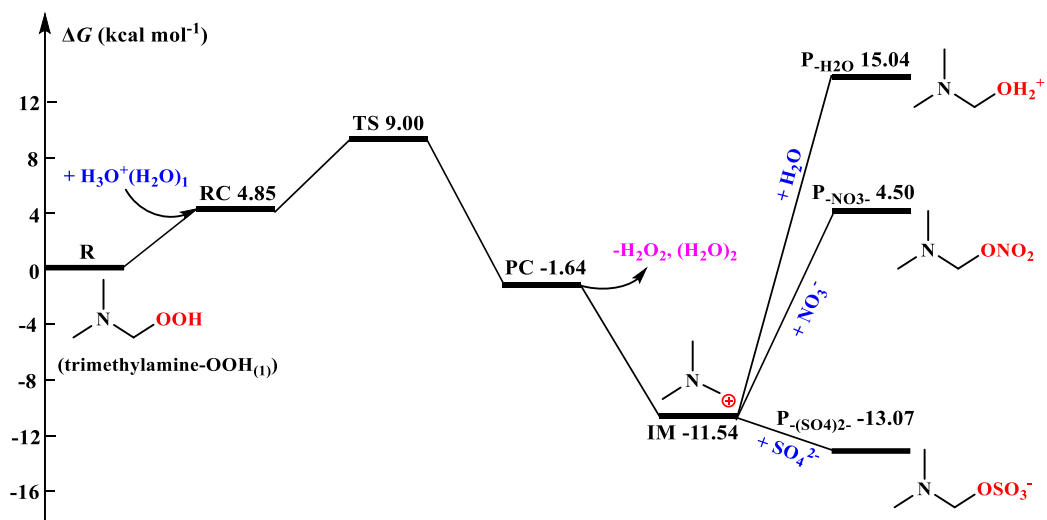

**Figure S17.** Calculated schematic free-energy surfaces for acid-catalyzed hydrolysis of trimethylamine-OOH<sub>(1)</sub> at the SMD/M06-2X/6-311++G(3df,2pd)/M06-2X/6-31+G(d,p) level. The free energies of ROOH and H<sub>3</sub>O<sup>+</sup>(H<sub>2</sub>O)<sub>1</sub> are set to zero (reference state). RC, TS, PC, IM and P represent pre-reactive complexes, transition states, post-reactive complexes, intermediates and products, respectively.

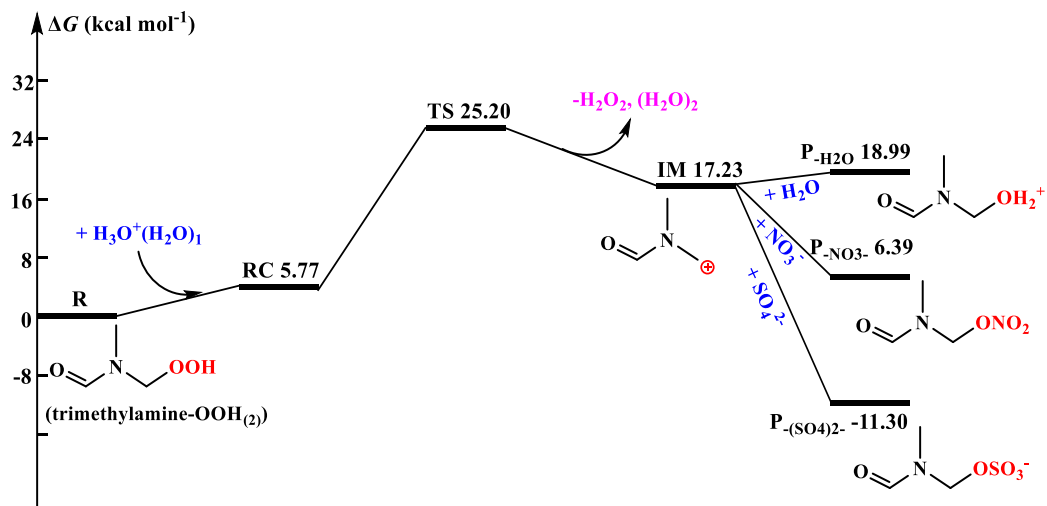

**Figure S18.** Calculated schematic free-energy surfaces for acid-catalyzed hydrolysis of trimethylamine-OOH<sub>(2)</sub> at the SMD/M06-2X/6-311++G(3df,2pd)/M06-2X/6-31+G(d,p) level. The free energies of ROOH and H<sub>3</sub>O<sup>+</sup>(H<sub>2</sub>O)<sub>1</sub> are set to zero (reference state). RC, TS, IM and P represent pre-reactive complexes, transition states, intermediates and products, respectively.

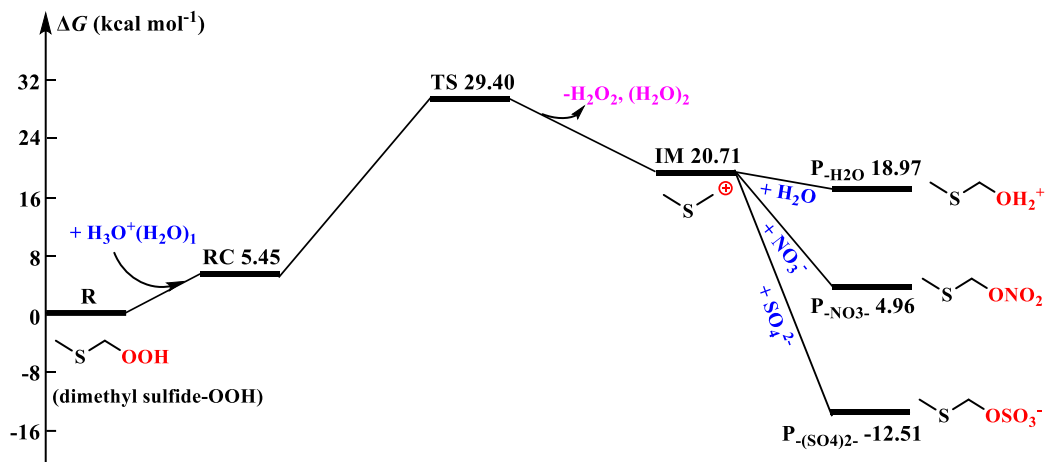

**Figure S19.** Calculated schematic free-energy surfaces for acid-catalyzed hydrolysis of dimethyl sulfide-OOH at the SMD/M06-2X/6-311++G(3df,2pd)//M06-2X/6-31+G(d,p) level. The free energies of ROOH and  $\text{H}_3\text{O}^+(\text{H}_2\text{O})_1$  are set to zero (reference state). RC, TS, IM and P represent pre-reactive complexes, transition states, intermediates and products, respectively.

**Table S1.** Calculated acid-catalyzed hydrolysis second-order reaction rate constants ( $k_A$ ) and the corresponding lifetimes ( $\tau_{1/e}$ ) of selected 45 ROOHs model compounds under two selected scenarios (Inland regions, China (pH 3.8) and Southeastern United States (pH 0.9)).

| Model compounds                         | X/Y                | $k_A$ (L mol <sup>-1</sup> s <sup>-1</sup> ) | $\tau_{1/e}$ , pH 3.8  | $\tau_{1/e}$ , pH 0.9  |
|-----------------------------------------|--------------------|----------------------------------------------|------------------------|------------------------|
| CH <sub>3</sub> CH <sub>2</sub> OOH     | —                  | $1.58 \times 10^{-21}$                       | $4.6 \times 10^{19}$ d | $5.8 \times 10^{16}$ d |
| CH(CH <sub>3</sub> ) <sub>2</sub> OOH   | —                  | $1.12 \times 10^{-14}$                       | $6.5 \times 10^{12}$ d | $8.2 \times 10^9$ d    |
| C(CH <sub>3</sub> ) <sub>3</sub> OOH    | —                  | $5.50 \times 10^{-7}$                        | $1.3 \times 10^5$ d    | $1.7 \times 10^2$ d    |
| CH <sub>2</sub> (X)OOH                  | NH <sub>2</sub>    | $1.01 \times 10^3$                           | 6.3 s                  | < 1 s                  |
|                                         | OH                 | $1.94 \times 10^{-5}$                        | $3.8 \times 10^3$ d    | 4.7 d                  |
|                                         | OCH <sub>3</sub>   | $4.45 \times 10^{-8}$                        | $1.6 \times 10^6$ d    | $2.1 \times 10^3$ d    |
|                                         | SH                 | $6.77 \times 10^{-16}$                       | $1.1 \times 10^{14}$ d | $1.4 \times 10^{11}$ d |
|                                         | CH=CH <sub>2</sub> | $8.11 \times 10^{-18}$                       | $9.0 \times 10^{15}$ d | $1.1 \times 10^{13}$ d |
|                                         | PH <sub>2</sub>    | $2.08 \times 10^{-16}$                       | $3.5 \times 10^{14}$ d | $4.4 \times 10^{11}$ d |
|                                         | F                  | $1.07 \times 10^{-27}$                       | —                      | —                      |
|                                         | Cl                 | $4.63 \times 10^{-30}$                       | —                      | —                      |
|                                         | CHO                | $1.43 \times 10^{-25}$                       | —                      | —                      |
| CH(CH <sub>3</sub> )(X)OOH              | NH <sub>2</sub>    | $5.60 \times 10^4$                           | < 1 s                  | < 1 s                  |
|                                         | OH                 | $3.20 \times 10^{-1}$                        | 5.5 h                  | 24.8 s                 |
|                                         | OCH <sub>3</sub>   | $3.24 \times 10^{-3}$                        | 22.6 d                 | 40.9 min               |
|                                         | SH                 | $1.40 \times 10^{-9}$                        | $5.2 \times 10^7$ d    | $6.6 \times 10^4$ d    |
|                                         | CH=CH <sub>2</sub> | $1.62 \times 10^{-9}$                        | $4.5 \times 10^7$ d    | $5.7 \times 10^4$ d    |
|                                         | PH <sub>2</sub>    | $2.73 \times 10^{-14}$                       | $2.7 \times 10^{12}$ d | $3.4 \times 10^9$ d    |
|                                         | F                  | $1.05 \times 10^{-25}$                       | —                      | —                      |
|                                         | Cl                 | $2.88 \times 10^{-29}$                       | —                      | —                      |
|                                         | CHO                | $3.73 \times 10^{-25}$                       | —                      | —                      |
| C(CH <sub>3</sub> ) <sub>2</sub> (X)OOH | NH <sub>2</sub>    | $3.10 \times 10^7$                           | < 1 s                  | < 1 s                  |
|                                         | OH                 | $4.87 \times 10^2$                           | 13.0 s                 | < 1 s                  |
|                                         | OCH <sub>3</sub>   | $3.93 \times 10^1$                           | 2.7 min                | < 1 s                  |
|                                         | SH                 | $1.36 \times 10^{-5}$                        | $5.4 \times 10^3$ d    | 6.8 d                  |
|                                         | CH=CH <sub>2</sub> | $7.72 \times 10^{-7}$                        | $9.5 \times 10^4$ d    | $1.2 \times 10^2$ d    |
|                                         | PH <sub>2</sub>    | $2.42 \times 10^{-8}$                        | $3.0 \times 10^6$ d    | $3.8 \times 10^3$ d    |
|                                         | F                  | $1.62 \times 10^{-14}$                       | —                      | —                      |
|                                         | Cl                 | $6.65 \times 10^{-16}$                       | —                      | —                      |
|                                         | CHO                | $2.54 \times 10^{-19}$                       | —                      | —                      |

|                                                           |                                                 |                          |                         |                         |
|-----------------------------------------------------------|-------------------------------------------------|--------------------------|-------------------------|-------------------------|
| C(CH <sub>3</sub> ) <sub>2</sub> (CH <sub>2</sub> (X))OOH | NH <sub>2</sub>                                 | 7.38 × 10 <sup>-8</sup>  | —                       | —                       |
|                                                           | OH                                              | 1.49 × 10 <sup>-8</sup>  | —                       | —                       |
|                                                           | OCH <sub>3</sub>                                | 4.66 × 10 <sup>-10</sup> | —                       | —                       |
|                                                           | SH                                              | 3.03 × 10 <sup>-9</sup>  | —                       | —                       |
|                                                           | CH=CH <sub>2</sub>                              | 2.11 × 10 <sup>-7</sup>  | —                       | —                       |
|                                                           | PH <sub>2</sub>                                 | 2.19 × 10 <sup>-8</sup>  | —                       | —                       |
|                                                           | F                                               | 2.04 × 10 <sup>-10</sup> | —                       | —                       |
|                                                           | Cl                                              | 5.36 × 10 <sup>-11</sup> | —                       | —                       |
| C(CH <sub>3</sub> ) <sub>2</sub> (O(Y))OOH                | CHO                                             | 1.17 × 10 <sup>-10</sup> | —                       | —                       |
|                                                           | CH <sub>2</sub> CH <sub>3</sub>                 | 2.17 × 10 <sup>1</sup>   | 4.9 min                 | < 1 s                   |
|                                                           | CH <sub>2</sub> CH <sub>3</sub> CH <sub>3</sub> | 1.76 × 10 <sup>1</sup>   | 6.0 min                 | < 1 s                   |
|                                                           | CH(CH <sub>3</sub> ) <sub>2</sub>               | 4.16 × 10 <sup>2</sup>   | 15.2 s                  | < 1 s                   |
|                                                           | C(CH <sub>3</sub> ) <sub>3</sub>                | 1.81 × 10 <sup>3</sup>   | 3.5 s                   | < 1 s                   |
|                                                           | CH=CH <sub>2</sub>                              | 1.62 × 10 <sup>-3</sup>  | 45.1 d                  | 1.4 h                   |
|                                                           | CHO                                             | 5.80 × 10 <sup>-9</sup>  | 1.3 × 10 <sup>7</sup> d | 1.6 × 10 <sup>4</sup> d |

**Table S2.** Calculated acid-catalyzed hydrolysis second-order reaction rate constants ( $k_A$ ) and the corresponding lifetimes ( $\tau_{1/e}$ ) of 7 atmospheric ROOHs under two selected scenarios (Inland regions, China (pH 3.8) and Southeastern United States (pH 0.9)).

| Compounds Name                      | $k_A$ (L mol <sup>-1</sup> s <sup>-1</sup> ) | $\tau_{1/e}$ , pH 3.8  | $\tau_{1/e}$ , pH 0.9  |
|-------------------------------------|----------------------------------------------|------------------------|------------------------|
| trimethylamine-OOH <sub>(1)</sub>   | $1.56 \times 10^6$                           | < 1 s                  | < 1 s                  |
| $\alpha$ -pinene-OOH <sub>(1)</sub> | $3.68 \times 10^{-2}$                        | 2 d                    | 3.6 min                |
| trimethylamine-OOH <sub>(2)</sub>   | $2.05 \times 10^{-6}$                        | $3.6 \times 10^4$ d    | 45 d                   |
| $\alpha$ -pinene-OOH <sub>(2)</sub> | $1.90 \times 10^{-7}$                        | $3.8 \times 10^5$ d    | 484 d                  |
| isoprene-OOH                        | $1.88 \times 10^{-8}$                        | $3.9 \times 10^6$ d    | $4.9 \times 10^3$ d    |
| dimethyl sulfide-OOH                | $1.71 \times 10^{-9}$                        | $4.3 \times 10^7$ d    | $5.4 \times 10^4$ d    |
| $\alpha$ -pinene-OOH <sub>(3)</sub> | $8.99 \times 10^{-21}$                       | $8.1 \times 10^{18}$ d | $1.0 \times 10^{16}$ d |
